# Supplementary material for: Synthesis of anti and syn hydroxy-iso-evoninic acids
Source: Royal Society of Chemistry journal article supplement (doi:10.1039/c2ob25625h), 2012-01-01
Supplement: c2ob25625h_2.pdf [file c2ob25625h_2.pdf]

## Synthesis of *anti* and *syn* Hydroxy-*iso*-Evoninic Acids

Sarah A. Warren,<sup>a</sup> Stephen Stokes,<sup>b</sup> Christopher S. Frampton,<sup>c</sup> Andrew J. P. White<sup>a</sup> and Alan C. Spivey\*<sup>a</sup>

<sup>a</sup>Department of Chemistry, Imperial College, London, SW7 2AY, UK, <sup>b</sup>AstraZeneca, Alderley Park, Macclesfield, Cheshire, SK10 4TG, <sup>c</sup>Pharmorphix® Solid State Services, Sigma-Aldrich Group, 250 Cambridge Science Park, Milton Road, Cambridge, CB4 0WE, UK.

[a.c.spivey@imperial.ac.uk](mailto:a.c.spivey@imperial.ac.uk)

### Supporting Information — X-Ray Crystallography

#### The X-ray crystal structure of (-)-(2*R*,3*S*)-**6a**

Crystal data for (-)-(2*R*,3*S*)-**6a**: C<sub>12</sub>H<sub>17</sub>NO<sub>3</sub>, *M* = 223.27, orthorhombic, *P*2<sub>1</sub>2<sub>1</sub>2<sub>1</sub> (no. 19), *a* = 7.5034(2), *b* = 12.2919(4), *c* = 13.0178(4) Å, *V* = 1200.65(6) Å<sup>3</sup>, *Z* = 4, *D*<sub>c</sub> = 1.235 g cm<sup>-3</sup>, μ(Cu-Kα) = 0.725 mm<sup>-1</sup>, *T* = 100 K, colourless laths, Agilent Technologies SuperNova diffractometer; 2448 independent measured reflections (*R*<sub>int</sub> = 0.0413), *F*<sup>2</sup> refinement, *R*<sub>1</sub>(obs) = 0.0302, *wR*<sub>2</sub>(all) = 0.0760, 2287 independent observed absorption-corrected reflections [*|F*<sub>o</sub>| > 4σ(*|F*<sub>o</sub>)], 2θ<sub>max</sub> = 149°], 153 parameters. The absolute structure of (-)-(2*R*,3*S*)-**2a** was determined by a combination of *R*-factor tests [*R*<sub>1</sub><sup>+</sup> = 0.0302, *R*<sub>1</sub><sup>-</sup> = 0.0305], use of the Flack parameter [*x*<sup>+</sup> = 0.00(17), *x*<sup>-</sup> = 1.02(17)] and determination using Bayesian statistics on Bijvoet differences (Hooft *et al.*, 2008), as implemented in the program PLATON (Spek, 2003). This gave probability values *p*3(ok), *p*3(twin) and *p*3(wrong) of 1.0, 0.4 × 10<sup>-6</sup> and 0.6 × 10<sup>-25</sup> respectively (1.0, 0.0, 0.0). The calculation was based on 5999 Bijvoet pairs. CCDC 869566.

The O(1) hydrogen atom was located from a Δ*F* map and refined freely.

#### The X-ray crystal structure of (+)-(2*S*,3*S*)-**6b**

Crystal data for (+)-(2*S*,3*S*)-**6b**: C<sub>12</sub>H<sub>17</sub>NO<sub>3</sub>, *M* = 223.27, orthorhombic, *P*2<sub>1</sub>2<sub>1</sub>2<sub>1</sub> (no. 19), *a* = 5.97836(4), *b* = 12.67070(7), *c* = 15.76352(9) Å, *V* = 1194.087(12) Å<sup>3</sup>, *Z* = 4, *D*<sub>c</sub> = 1.242 g cm<sup>-3</sup>, μ(Cu-Kα) = 0.729 mm<sup>-1</sup>, *T* = 173 K, colourless shards, Oxford Diffraction Xcalibur PX Ultra diffractometer; 2366 independent measured reflections (*R*<sub>int</sub> = 0.0283), *F*<sup>2</sup> refinement, *R*<sub>1</sub>(obs) = 0.0262, *wR*<sub>2</sub>(all) = 0.0726, 2337 independent observed absorption-corrected reflections [*|F*<sub>o</sub>| > 4σ(*|F*<sub>o</sub>)], 2θ<sub>max</sub> = 145°], 152 parameters. The absolute structure of

(+)-(2*S*,3*S*)-**6b** was determined by a combination of *R*-factor tests [ $R_1^+ = 0.0262$ ,  $R_1^- = 0.0264$ ] and by use of the Flack parameter [ $x^+ = 0.00(16)$ ,  $x^- = 1.05(16)$ ]. CCDC 869567.

The O(14) hydrogen atom was located from a  $\Delta F$  map and refined freely subject to an O–H distance constraint of 0.90 Å.

## Figures

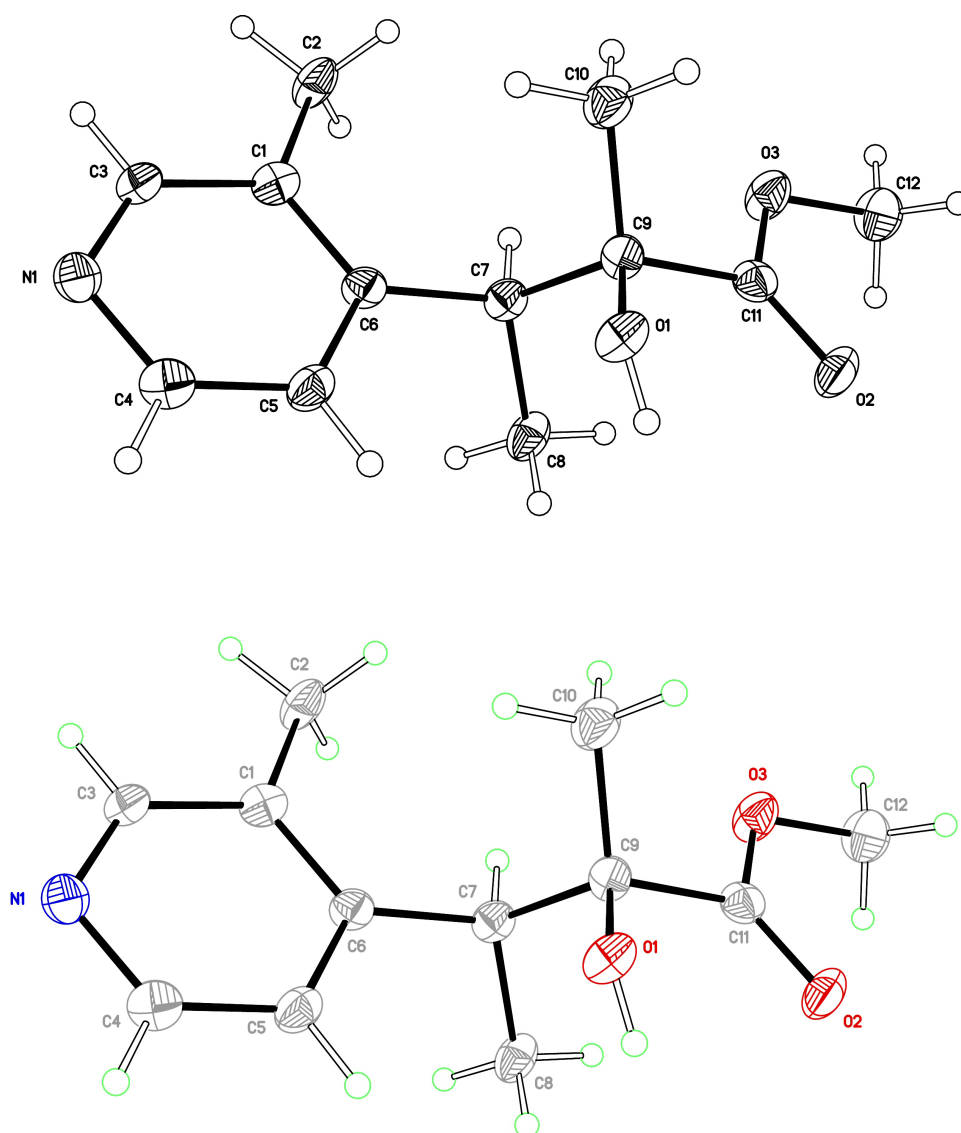

**Figure S1.** The molecular structure of (-)-6a showing the numbering scheme employed. Anisotropic atomic displacement ellipsoids for the non-hydrogen atoms are shown at the 50% probability level and hydrogen atoms are displayed as spheres of arbitrary radius.

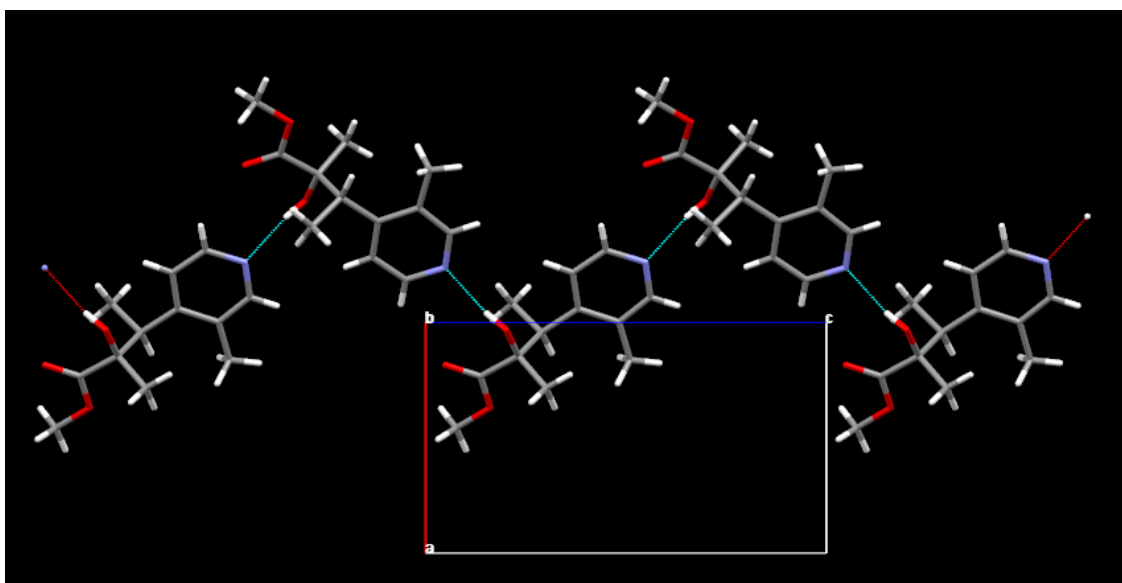

**Figure S2.** Single hydrogen bonded chain. View down the *b*-axis of (-)-6a.

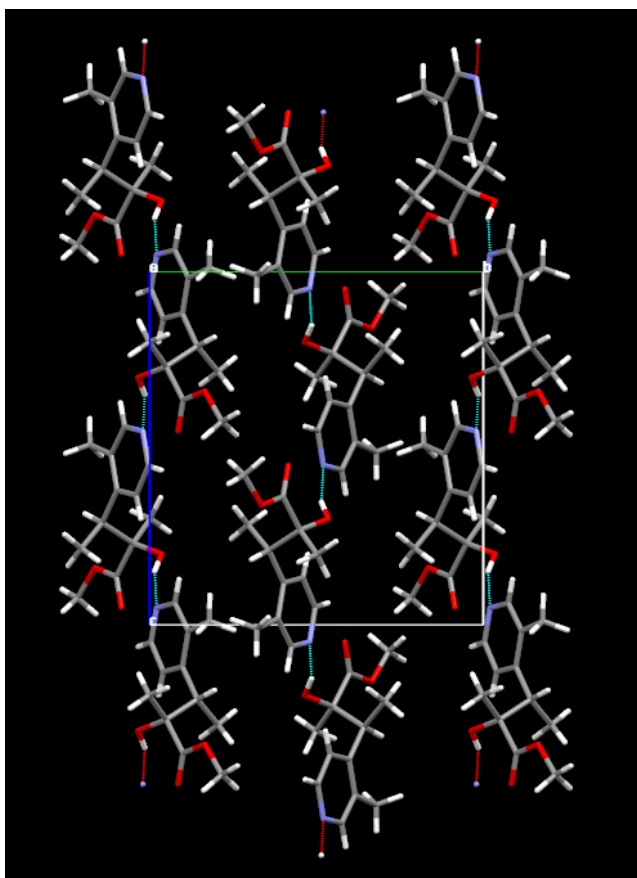

**Figure S3.** Crystal packing diagram. View down the *c*-axis of (-)-6a.

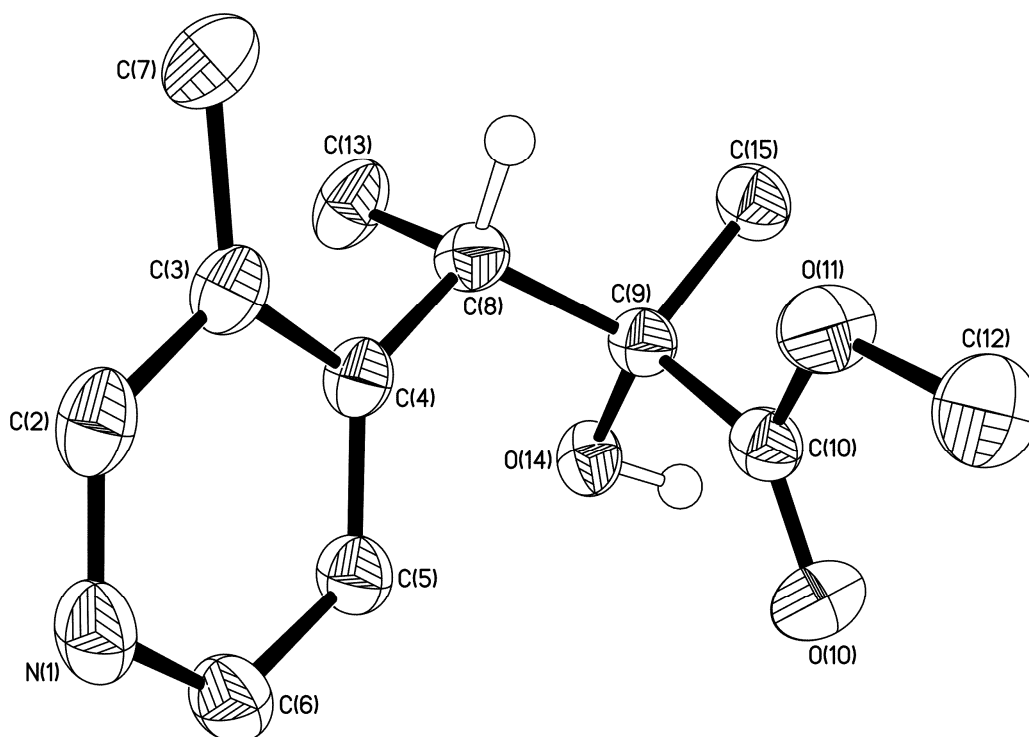

**Figure S4.** The crystal structure of (+)-(2*S*,3*S*)-**6b** (50% probability ellipsoids).

## References

- Agilent Technologies (2010). CrysAlis PRO. Version 1.171.34.46. Agilent Technologies, Yarnton, Oxfordshire, England.
- Flack, H. D. (1983). *Acta Cryst.* **A39**, 876–881.
- Flack, H. D. & Bernardinelli, G. (2000). *J. Appl. Cryst.* **33**, 1143–1148.
- Hooft, R. W. W., Straver, L. H. & Spek, A. L. (2008). *J. Appl. Cryst.* **41**, 96–103.
- Macrae, C. F., Bruno, I. J., Chisholm, J. A., Edgington, P. R., McCabe, P., Pidcock, E., Rodriguez-Monge, L., Taylor, R., van de Streek, J. & Wood, P. A. (2008). *J. Appl. Cryst.* **41**, 466–470.
- Sheldrick, G. M. (2008). *Acta Cryst.* **A64**, 112–122.
- Spek, A. L. (2009). *Acta Cryst.* **D65**, 148–155.
